# Supplementary material for: Pre-transplant inflammation and its associations with acute GvHD and mortality in pediatric allogeneic hematopoietic stem cell transplantation patients
Source: Research Square preprint supplement (doi:10.21203/rs.3.rs-5356894/v1), 2024-12-18
Supplement: Supplementary file 1 [file e155fb76861246efb9ced5f8.xlsx]

## Sheet: Sheet1
Characteristic	N = 3841
Age	8.2 (0.2-18.6)
Patient sex
Male	235 (61%)
Female	149 (39%)
Diagnosis
Bone marrow failure	81 (21%)
Immunodeficiency	59 (15%)
Thalassemia	53 (14%)
Sickle cell disease	48 (13%)
Acute Myeloid Leukemia	39 (10%)
Acute Lymphoblastic Leukemia	38 (9.9%)
Hemophagocytic Lymphohistiocytosis	22 (5.7%)
Myelodysplastic syndrome	21 (5.5%)
Other hematologic malignancy	17 (4.4%)
Other non-malignant hematological disease	3 (0.8%)
Inborn error of metabolism	2 (0.5%)
Auto-immune/auto-inflammatory conditions	1 (0.3%)
Donor type
Matched unrelated donor (10/10)	129 (34%)
Mismatched unrelated donor	111 (29%)
Matched related donor (10/10)	105 (27%)
Mismatched related donor	38 (9.9%)
Unrelated donor (matching unknown)	1 (0.3%)
Graft type
Bone marrow	295 (77%)
Umbilical cord blood	50 (13%)
Peripheral blood stem cells	39 (10%)
Conditioning
Treosulfan based	179 (47%)
Busulfan based	120 (31%)
Fludarabine, Cyclofosfamide	54 (14%)
Etoposide + TBI	17 (4.4%)
Other	14 (3.6%)
Serotherapy
ATG	276 (72%)
Alemtuzumab	66 (17%)
No serotherapy	42 (11%)
1 Median (Minimum-Maximum); n (%)
